# Supplementary material
Source: PubMed Central journal article supplement (PMC2930461)
Supplement: 1006507107_pnas.1006507107_SI.pdf [file 1006507107_pnas.1006507107_SI.pdf]

# Supporting Information

Bhattacharyya et al. 10.1073/pnas.1006507107

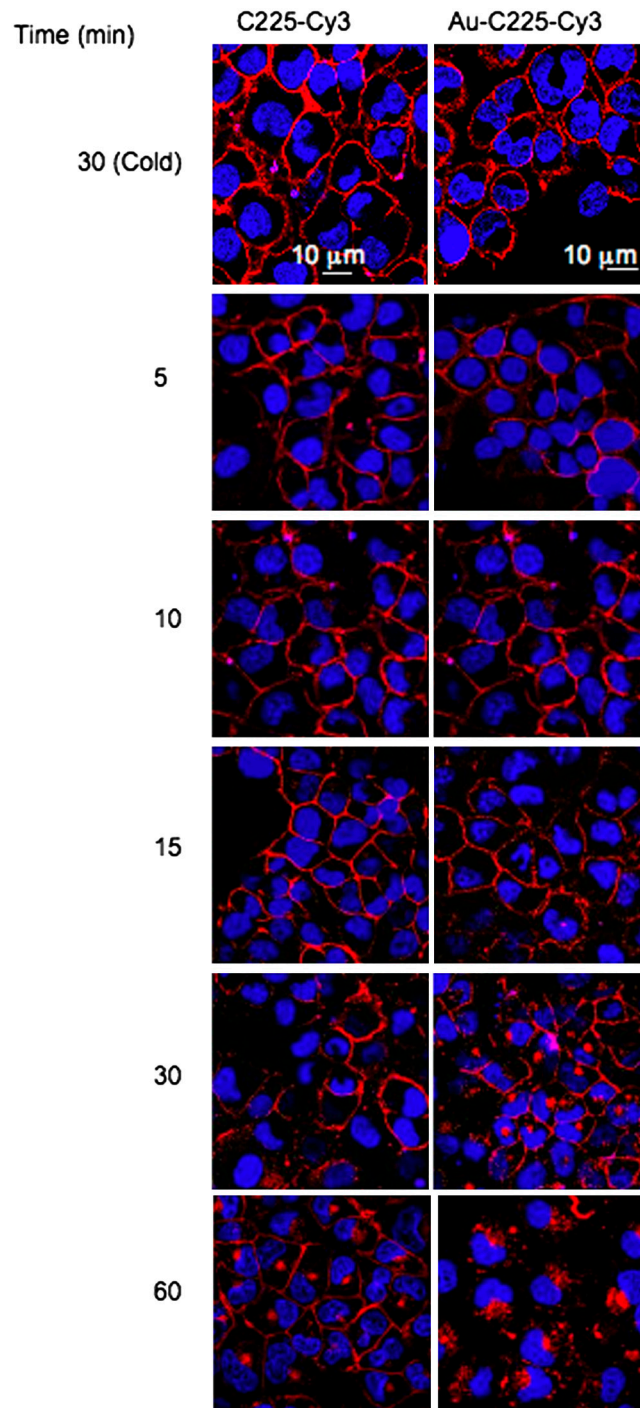

**Fig. S1.** Time course of EGFR Endocytosis by C225-Cy3 and Au-C225-Cy3. Fluorescence image representing the binding of C225-Cy3 and Au-C225-Cy3 to EGFR in PANC-1 in human pancreatic cancer cells. The nucleus is stained with DAPI (blue). Cells were treated separately with C225-Cy3 and Au-C225-Cy3 for different time points starting from 5 min.–60 min. at 37 °C. Different extent of internalization of EGFR was observed in PANC-1 when treated with Au-C225-Cy3 (Figures on right) treatment as compared to C225-Cy3 alone (Figures on left) at different time points. Pictures were taken at 63X/1.2 W with scan zoom 1.0. All pictures are taken at same magnification and have same scale bar of 10 μm.
